# Supplementary material
Source: PubMed Central journal article supplement (PMC3807455)
Supplement: JB.00600-13_zjb999092828so1.pdf [file JB.00600-13_zjb999092828so1.pdf]

**Table S1. Strains used in the study**

| <b>Strains</b> | <b>Description</b>                                         | <b>Source</b> |
|----------------|------------------------------------------------------------|---------------|
| CB15N          | Synchronizable derivative of CB15                          | 1             |
| CJW2141        | <i>pbp3Y270N</i> (PBP3 <sup>Ts</sup> ) <i>CC2570::Gent</i> | 2             |
| LS117          | <i>Δbla</i>                                                | Alley, MRK    |
| ZG1020         | <i>ΔpbpX</i>                                               | This study    |
| ZG1021         | <i>Δpbp1a</i>                                              | This study    |
| ZG1022         | <i>ΔpbpY</i>                                               | This study    |
| ZG1023         | <i>ΔpbpC</i>                                               | This study    |
| ZG1024         | <i>ΔpbpZ</i>                                               | This study    |
| ZG1025         | <i>ΔmtgA</i>                                               | This study    |
| ZG1026         | <i>ΔpbpX Δpbp1a</i>                                        | This study    |
| ZG1027         | <i>ΔpbpX ΔpbpY</i>                                         | This study    |
| ZG1028         | <i>ΔpbpX ΔpbpC</i>                                         | This study    |
| ZG1029         | <i>ΔpbpX ΔpbpZ</i>                                         | This study    |
| ZG1030         | <i>ΔpbpX ΔmtgA</i>                                         | This study    |
| ZG1031         | <i>Δpbp1a ΔpbpY</i>                                        | This study    |
| ZG1032         | <i>Δpbp1a ΔpbpC</i>                                        | This study    |
| ZG1033         | <i>Δpbp1a ΔpbpZ</i>                                        | This study    |
| ZG1034         | <i>Δpbp1a ΔmtgA</i>                                        | This study    |
| ZG1035         | <i>ΔpbpY ΔpbpC</i>                                         | This study    |
| ZG1036         | <i>ΔpbpY ΔpbpZ</i>                                         | This study    |
| ZG1037         | <i>ΔpbpY ΔmtgA</i>                                         | This study    |
| ZG1038         | <i>ΔpbpC ΔpbpZ</i>                                         | This study    |
| ZG1039         | <i>ΔpbpC ΔmtgA</i>                                         | This study    |
| ZG1040         | <i>ΔpbpC ΔmtgA</i>                                         | This study    |
| ZG1041         | <i>Δbla ΔpbpX</i>                                          | This study    |
| ZG1042         | <i>Δbla Δpbp1a</i>                                         | This study    |
| ZG1043         | <i>Δbla ΔpbpY</i>                                          | This study    |
| ZG1044         | <i>Δbla ΔpbpC</i>                                          | This study    |
| ZG1045         | <i>Δbla ΔpbpZ</i>                                          | This study    |
| ZG1046         | <i>Δbla ΔmtgA</i>                                          | This study    |
| ZG1047         | <i>P<sub>pbpX</sub>::msfGFP-pbpX</i>                       | This study    |
| ZG1048         | <i>P<sub>pbpY</sub>::msfGFP-pbpY</i>                       | This study    |
| ZG1049         | <i>P<sub>pbpC</sub>::msfGFP-pbpC</i>                       | This study    |
| ZG1050         | <i>Δpbp1a ΔpbpY ΔpbpC ΔpbpZ ΔmtgA</i>                      | This study    |
| ZG1051         | <i>P<sub>pbpX</sub>::pbpX (E101Q E158Q)</i>                | This study    |
| ZG1052         | <i>P<sub>pbpX</sub>::pbpXS366A</i>                         | This study    |
| ZG1065         | CB15N <i>pbp3Y270N CC2570::Gent</i>                        | This study    |
| ZG1066         | <i>ΔpbpX pbp3Y270N CC2570::Gent</i>                        | This study    |
| ZG1067         | <i>Δpbp1a pbp3Y270N CC2570::Gent</i>                       | This study    |
| ZG1068         | <i>ΔpbpY pbp3Y270N CC2570::Gent</i>                        | This study    |
| ZG1069         | <i>ΔpbpC pbp3Y270N CC2570::Gent</i>                        | This study    |
| ZG1070         | <i>ΔpbpZ pbp3Y270N CC2570::Gent</i>                        | This study    |

---

|        |                                                             |            |
|--------|-------------------------------------------------------------|------------|
| ZG1071 | <i>ΔmtgA pbp3Y270N CC2570::Gent</i>                         | This study |
| ZG1072 | <i>P<sub>pbp1a</sub>::msfGFP-pbp1a</i>                      | This study |
| ZG1073 | <i>P<sub>pbp1a</sub>::msfGFP-pbp1a ΔpbpX ΔpbpY</i>          | This study |
| ZG1074 | <i>P<sub>pbpC</sub>::msfGFP-pbpC ΔpbpX ΔpbpY</i>            | This study |
| ZG1150 | <i>P<sub>xyl</sub>::pbpX Δpbp1a ΔpbpY ΔpbpC ΔpbpZ ΔmtgA</i> | This study |

---

**Table S2. Plasmids used in the study**

| <b>Plasmids</b>             | <b>Description</b>                                                                          | <b>Source</b> |
|-----------------------------|---------------------------------------------------------------------------------------------|---------------|
| pNPTS138                    | Vector for making deletion constructs                                                       | Alley, MRK    |
| pNPTS-msfGFP-<br>pbp1a      | For making native-site msfGFP-PBP1A fusion                                                  | This study    |
| pNPTS-msfGFP-<br>pbpC       | For making native-site msfGFP-PbpC fusion                                                   | This study    |
| pNPTS-msfGFP-<br>pbpX       | For making native-site msfGFP-PbpX fusion                                                   | This study    |
| pNPTS-msfGFP-<br>pbpY       | For making native-site msfGFP-PbpY fusion                                                   | This study    |
| pNPTS-mtgA                  | For deletion of <i>mtgA</i>                                                                 | This study    |
| pNPTS-pbp1a                 | For deletion of <i>pbp1a</i>                                                                | This study    |
| pNPTS-pbpC                  | For deletion of <i>pbpC</i>                                                                 | This study    |
| pNPTS-pbpX                  | For deletion of <i>pbpX</i>                                                                 | This study    |
| pNPTS-pbpX (E101Q<br>E158Q) | For allelic replacement of <i>pbpX</i> with E101Q<br>E158Q double mutant variant            | This study    |
| pNPTS-pbpX S366A            | For allelic replacement of <i>pbpX</i> with S366A<br>mutant variant                         | This study    |
| pNPTS-pbpY                  | For deletion of <i>pbpY</i>                                                                 | This study    |
| pNPTS-pbpZ                  | For deletion of <i>pbpZ</i>                                                                 | This study    |
| pRXMCS-5                    | Low copy vector for xylose-inducible<br>expression                                          | 3             |
| pRX-pbpX (E101Q<br>E158Q)   | PbpX (E101Q E158Q) expression vector                                                        | This study    |
| pXMCS-5                     | Integrating vector for constructing xylose-<br>regulated depletions by single recombination | 3             |
| pXyl-pbpX'                  | For depletion of <i>pbpX</i>                                                                | This study    |

**Table S3. Primers used in the study**

| <b>Primer</b>      | <b>Sequence</b>                                |
|--------------------|------------------------------------------------|
| 0252 DUR           | CTCTAGTACGGCAACTGGTTCGAAGGGTCCGTTCCGCATGATC    |
| 0252E101Q R        | CTGGCGGTCTTGGATGGCGATGAACGCCGCCGGGAC           |
| 0252E101Q F        | CATCGCCATCCAAGACCGCCAGTTCTATCAC                |
| 0252E158Q R        | CAGGATCAGCTGCTGGGCCTTGC GGCGATAGTTC            |
| 0252E158Q F        | CAAGGCCCAGCAGCTGATCCTGGCCATCTGG                |
| 0252S366A R        | CTTGAAGGCCGCTCCGGCCTGACGACGGGCGGTG             |
| 0252S366A F        | GTCAGGCCGGAGCGGCCTTCAAGCCGTTTCGTC              |
| 0252 UDF           | GATCATGGCGAACGGACCCTTCGACCAGTTGCCGTA TAGAG     |
| 0252U-sfgfp F      | CAATACGATCATGAGTAAAGGTGAAGA ACTGTTC            |
| 1516 DUR           | GGTTCGTCGGTAGGCGAGGTGTCGGTAGGATCAGACATAGG      |
| 1516 UDF           | CCTATGTCTGATCCTACCGACACCTCGCCTACCGACGAACC      |
| 1516U-sfgfp F      | CGCCAAGCCTATGAGTAAAGGTGAAGA ACTGTTC            |
| 1875 DUR           | GGCTTTTGTGTGGGCTTACCGATGGCCATCCATCGTTCCG       |
| 1875 UDF           | CCGAACGATGGATGGCCATCGGTAAGCCACACAAAAGCC        |
| 1875U-sfgfp F      | CGAACGATGGATGAGTAAAGGTGAAGA ACTGTTC            |
| 3277 DUR           | CTCTAGTAGGGCAGGTTGTCCCGTCGTCGA ACTTG TAGG      |
| 3277 UDF           | CCTACAAGTTCGACGACGGGGACAACCTGCCCTACTAGAG       |
| 3277U-sfgfp F      | GACGCAAACCGTGAGTAAAGGTGAAGA ACTGTTC            |
| 3570 DUR           | CTCCCTTGATCCGCACCTTGGCGATCAGGACCTTGGTCAGCC     |
| 3570 UDF           | GGCTGACCAAGGTCTGATCGCCAAGGTGCGGATCAAGGGAG      |
| AgeI-0252 R        | CTACCGGTGGCCTCTCTAGTACGGCAAC                   |
| EcoRI-0252 Fint180 | TTGAATTCGCCCTCGATCAACTATCTGGAC                 |
| EcoRI-0252 UF      | TTGAATTCGGATGACGTTGAAGGCGATC                   |
| EcoRI-0252 UF550   | TTGAATTCGGAAGTGGCTGGAGTTGTCTG                  |
| EcoRI-1516 UF      | TTGAATTCGACAAGGAGAACATCCTCG                    |
| EcoRI-1875 UF      | TTGAATTCGAAGGTGGTCGTGATCGACG                   |
| EcoRI-3277 UF      | TTGAATTCGTCTCGCGCTTCAACGCCAAG                  |
| EcoRI-3570 UF      | TTGAATTCGGCTGGAGA ACTCGGTCAAG                  |
| EcoRI-KpnI-0252 F  | TTGAATTCCTTGGTACCATGGCGAACGGACCCTTCGG          |
| EcoRI-KpnI-1516 F  | TTGAATTCCTTGGTACCATGTCTGATCCTACCGACCC          |
| EcoRI-KpnI-1875 F  | TTGAATTCCTTGGTACCATGGCCATCGCGGGCGTGGCGGTG      |
| EcoRI-KpnI-3277 F  | TTGAATTCCTTGGTACCATGAACGACTGGACGCTGCCG         |
| EcoRI-mtgA UF      | CAGAATTCAGCTTCCACGTGAGCGTGTG                   |
| KpnI-sfgfp R       | TTGGTACCGCTGCCTTTGTAGAGTTCATCCATGCC            |
| MCSC-EcoRI-0252 UF | GTATCGATAAGCTTGATATCGAATTCAGGATCTTCTGGGTCTCG   |
| MCSC-EcoRI-1875 UF | GTATCGATAAGCTTGATATCGAATTCGAAGGTGGTCGTGATCGACG |
| MCSC-SpeI-0252 R   | GTGGCGGCCGCTCTAGA ACTAGTCCTCTCTAGTACGGCAACTGG  |
| MCSC-SpeI-1875 R   | GTGGCGGCCGCTCTAGA ACTAGTCCTCGCGCAATGGACGTCAG   |
| mtgA DUR           | CTAAGCCACGCAGTCAGCCAGCACGAAACGCCCCACTTGTCT     |
| mtgA UDF           | GACAAGTGGGGCGTTTCGTGCTGGCTGACTGCGTGGCTTAG      |

---

|                    |                                     |
|--------------------|-------------------------------------|
| NdeI-0252 F        | TTTTCATATGGCGAACGGACCCTTCGG         |
| NheI-0252 Rint     | CAGCTAGCTTAGATCGAGGGCTGACGCTTGAC    |
| sfgfp-0252 UR      | CTTCACCTTTACTCATGATCGTATTGTTCCCTAC  |
| sfgfp-1516 UR      | CTTCACCTTTACTCATAGGCTTGGCGCTCGCTTC  |
| sfgfp-1875 UR      | CTTCACCTTTACTCATCCATCGTTCGGTGGGTTTC |
| sfgfp-3277 UR      | CTTCACCTTTACTCACGGTTTGCGTCAGGCTCTG  |
| SpeI-0252 DR       | TTACTAGTCACGCGATCTAGAGGCGATG        |
| SpeI-0252 Rint1340 | TTACTAGTCCAGCTGGATCTTGCTGGTG        |
| SpeI-1516 DR       | TTACTAGTGATGGTGCCGACGATGGCGTTG      |
| SpeI-1516 Rint     | TTACTAGTCCAGTTGCTGGGTGATGGTCGAG     |
| SpeI-1875 DR       | TTACTAGTGGAATGTGCGTGAGACGCAC        |
| SpeI-3277 DR       | TTACTAGTGAGCGAACAGGCCTTGATCG        |
| SpeI-3277 R        | TTACTAGTCCTAACGCGCTCTAGTAGGG        |
| SpeI-3570 DR       | TTACTAGTCGCTTCAATGTCGACCTGTC        |
| SpeI-mtgA DR       | TTACTAGTCGGCCATCGCCTTGATCAAG        |

---

## Strain and Plasmid Construction

### Strains

ZG1020-1025: For the single deletions of the GTase-encoding genes, the pNPTS-pbpX, pNPTS-pbp1a, pNPTS-pbpY, pNPTS-pbpC, pNPTS-pbpZ, and pNPTS-mtgA were integrated into CB15N chromosome. Then, the first integrants were submitted to counterselection with sucrose, and Suc<sup>R</sup> Kan<sup>S</sup> colonies were screened for Kan<sup>S</sup>. Finally, the Kan<sup>S</sup> colonies were screened by PCR to identify those that contained the appropriate deletions.

ZG1026-1046: For the double deletions of the GTase genes and for the double mutants in a TG gene and *bla*, pNPTS vectors originally used to construct the GTase deletion strains were re-integrated into the corresponding deletion strains for the use as a selective marker (for example, pNPTS-pbp1a was re-integrated into  $\Delta$ *pbp1a*).  $\phi$ Cr30 phage lysates were subsequently made from these integrants and used to transduce either  $\Delta$ *bla* or another single GTase mutant. The integrated plasmid was then cured by counterselection with sucrose, and Suc<sup>R</sup> Kan<sup>S</sup> colonies were isolated. In the case of several strains encoding *ApbpX* as one of the two mutations, the incidence of suppressor mutants necessitated using double homologous recombination with pNPTS-pbpX vector to introduce  $\Delta$ *pbpX* into other genetic backgrounds, as described for the single deletion (ZG1020). All double mutants were checked by PCR to ensure the presence of the desired deletions.

ZG1047-1049, ZG1072: For the construction of msfGFP fusions to GTases encoded at the native loci, pNPTS-msfGFP-pbpX, pNPTS-msfGFP-pbp1a, pNPTS-msfGFP-pbpY, or pNPTS-msfGFP-pbpC were integrated into CB15N chromosome, and the integrants were subjected to sucrose counterselection. Suc<sup>R</sup> Kan<sup>S</sup> colonies were screened by PCR to confirm the presence of msfGFP.

ZG1050: For the construction of the PbpX-Only ( $\Delta$ *pbp1a*  $\Delta$ *pbpY*  $\Delta$ *pbpC*  $\Delta$ *pbpZ*  $\Delta$ *mtgA*) strain, the procedure described above for constructing double GTase deletions was repeated a total of four times to introduce additional mutations into the original single deletion background. The presence of all desired deletions in the final strain was confirmed by PCR.

ZG1051-1052: For the allelic substitutions of *pbpX* with mutant variants, pNPTS-pbpX(E101Q E158Q) and pNPTS-pbpXS366A were integrated into CB15N chromosome followed by counterselection for sucrose resistance and a screen for the loss of Kan<sup>R</sup>. The resulting Suc<sup>R</sup> Kan<sup>S</sup> colonies were subjected to PCR with *pbpX*-specific primers, and the PCR products were sequenced to screen for the presence of the desired mutations.

ZG1065-1071: For the construction of strains with PBP3<sup>Ts</sup> genotype, the *CC2570::Gent* gene insert linked to the *pbp3* gene in CJW2141 was transduced into CB15N and the single GTase deletion mutants, selecting for gentamycin resistance. The resulting Gent<sup>R</sup>

colonies were patched in duplicate onto PYE + gentamycin plates and incubated at RT and 37°C to screen for temperature sensitivity.

ZG1073-4: For the construction of strains encoding msfGFP fusions to PBP1A or PbpC in  $\Delta pbpX \Delta pbpY$  mutant background, ZG1072 and ZG1049, respectively, were successively transduced with lysates produced from ZG1020 with reintegrated pNPTS-pbpX and ZG1022 with reintegrated pNPTS-pbpY. Both plasmids were cured through counterselection for Suc<sup>R</sup> and screening for Kan<sup>S</sup> colonies.

ZG1150: To construct PbpX depletion strain in the  $\Delta pbp1a \Delta pbpY \Delta pbpC \Delta pbpZ \Delta mtgA$  mutant background, pXyl-pbpX' plasmid was integrated into the PbpX-Only strain (ZG1050) by single recombination.

## Plasmids

pNPTS-msfGFP-pbp1a: *pbp1a* upstream region (U) was PCR-amplified from CB15N with EcoRI-1516 UF and sfgfp-1516 UR primers. Also, *msfGFP* was PCR-amplified with 1516U-sfgfp F and KpnI-sfgfp R primers, and a 5' fragment of *pbp1a* itself was PCR-amplified with EcoRI-KpnI-1516 F and SpeI-1516 Rint primers. The *pbp1a* gene fragment was ligated into pNPTS138 via EcoRI and SpeI sites. Meanwhile, the U PCR product and *msfGFP* were combined by sewing PCR with EcoRI-1516 UF and KpnI-sfgfp R primers, and the resulting product was cloned into pCR-Blunt-II via TOPO Cloning kit (Invitrogen). Finally, the *CC1516U-msfGFP* insert was subcloned into the pNPTS138 derivative containing *pbp1a* 5' fragment via EcoRI and KpnI sites.

pNPTS-msfGFP-pbpC: *pbpC* upstream region was PCR-amplified from CB15N with EcoRI-3277 UF and sfgfp-3277 UR primers. Also, *msfGFP* was PCR-amplified with 3277U-sfgfp F and KpnI-sfgfp R primers, and *pbpC* itself was PCR-amplified with EcoRI-KpnI-3277 F and SpeI-3277 R primers. The *pbpC* gene PCR product was ligated into pNPTS138 via EcoRI and SpeI sites. Meanwhile, the upstream PCR product and *msfGFP* were combined by sewing PCR with EcoRI-3277 UF and KpnI-sfgfp R primers. Finally, the resulting PCR product was ligated into the pNPTS138 derivative containing *pbpC* via EcoRI and KpnI sites.

pNPTS-msfGFP-pbpX: *pbpX* upstream region was PCR-amplified from CB15N with MCSC-EcoRI-0252 UF and sfgfp-0252 UR primers. Also, *msfGFP* was PCR-amplified with 0252U-sfgfp F and KpnI-sfgfp R primers, and *pbpX* itself was PCR-amplified with EcoRI-KpnI-0252 F and MCSC-SpeI-0252 R primers. The *pbpX* gene PCR product was ligated into pNPTS138 via EcoRI and SpeI sites. Meanwhile, the upstream PCR product and *msfGFP* were combined by sewing PCR with MCS-EcoRI-0252 UF and KpnI-sfgfp R primers. Finally, the resulting PCR product was ligated into the pNPTS138 derivative containing *pbpX* via EcoRI and KpnI sites.

pNPTS-msfGFP-pbpY: *pbpY* upstream region was PCR-amplified from CB15N with MCSC-EcoRI-1875 UF and sfgfp-1875 UR primers. Also, *msfGFP* was PCR-amplified

with 1875U-sfgfp F and KpnI-sfgfp R primers, and *pbpY* itself was PCR-amplified with EcoRI-KpnI-1875 F and MCSC-SpeI-1875 R primers. The *pbpY* gene PCR product was ligated into pNPTS138 via EcoRI and SpeI sites. Meanwhile, the upstream PCR product and *msfGFP* were combined by sewing PCR with MCS-EcoRI-1875 UF and KpnI-sfgfp R primers. Finally, the resulting PCR product was ligated into the pNPTS138 derivative containing *pbpY* via EcoRI and KpnI sites.

pNPTS-mtgA: This plasmid is used to construct an in-frame deletion of *mtgA* (CC0325), leaving intact only the first 5 and the last 6 amino acid-encoding codons. To make the plasmid, the upstream (U) and downstream (D) regions of *mtgA* were PCR-amplified with EcoRI-mtgA UF and mtgA DUR primers and mtgA UDF and SpeI-mtgA DR primers, respectively. The resulting PCR products were then combined by sewing PCR with EcoRI-mtgA UF and SpeI-mtgA DR primers. Finally, the sewing PCR product was ligated into pNPTS138 plasmid via EcoRI and SpeI sites.

pNPTS-pbp1a: This plasmid is used to construct an in-frame deletion of *pbp1a* (CC1516), leaving intact only the first 6 and the last 26 codons of the coding sequence. To make the plasmid, the upstream (U) and downstream (D) regions of *pbp1a* were PCR-amplified with EcoRI-1516 UF and 1516 DUR primers and 1516 UDF and SpeI-1516 DR primers, respectively. The resulting U and D PCR products were then combined by sewing PCR with EcoRI-1516 UF and SpeI-1516 DR primers. Finally, the sewing PCR product was ligated into pNPTS138 plasmid via EcoRI and SpeI sites.

pNPTS-pbpC: This plasmid is used to construct an in-frame deletion of *pbpC* (CC3277), leaving intact the first 14 and the last 5 amino acid-encoding codons. To make the plasmid, the upstream (U) and downstream (D) regions of *pbpC* were PCR-amplified with EcoRI-3277 UF and 3277 DUR primers and 3277 UDF and SpeI-3277 DR primers, respectively. The resulting U and D PCR products were then combined by sewing PCR with EcoRI-3277 UF and SpeI-3277 DR primers. Finally, the sewing PCR product was ligated into pNPTS138 plasmid via EcoRI and SpeI sites.

pNPTS-pbpX: This plasmid is used to construct an in-frame deletion of *pbpX* (CC0252), leaving intact the first 6 and the last 5 codons (not counting the stop codon). To make the plasmid, the upstream (U) and downstream (D) regions of *pbpX* were PCR-amplified with EcoRI-0252 UF and 0252 DUR primers and 0252 UDF and SpeI-0252 DR primers, respectively. The resulting U and D PCR products were then combined by sewing PCR with EcoRI-0252 UF and SpeI-0252 DR primers. Finally, the sewing PCR product was ligated into pNPTS138 plasmid via EcoRI and SpeI sites.

pNPTS-pbpX(E101Q E158Q): 550bp of upstream sequence and the 5' part of *pbpX* up to the mutated 101<sup>st</sup> codon were PCR-amplified with EcoRI-0252 UF550 and 0252E101Q R primers. The part of *pbpX* between the 101<sup>st</sup> and 158<sup>th</sup> mutated codons was amplified with 0252E101Q F and 0252E158Q R primers. Also, the part of *pbpX* between the 158<sup>th</sup> and 447<sup>th</sup> codons was amplified with 0252E158Q F and SpeI-0252 Rint1340 primers. Then, sewing PCR was used to combine the first two PCR products via EcoRI-0252 UF550 and 0252E158Q R primers. Finally, this sewing PCR product



was combined with the *pbpX*(158-447) PCR product via another round of sewing PCR, this time using EcoRI-0252 UF550 and SpeI-0252 Rint1340. The final PCR product was ligated into pNPTS138 via EcoRI and SpeI sites.

pNPTS-pbpXS366A: the part of the *pbpX* gene between the 60<sup>th</sup> and the mutant 366<sup>th</sup> codons was PCR-amplified with EcoRI-0252 Fint180 and 0252S366A R primers. Also, the 3' part of the gene starting from the mutant 366<sup>th</sup> codon was amplified with 0252S366A F and MCSC-SpeI-0252 R primers. The two PCR products were combined, using sewing PCR with EcoRI-0252 Fint180 and MCSC-SpeI-0252 R primers. Finally, the resulting sewing PCR product was ligated into pNPTS138 via EcoRI and SpeI sites.

pNPTS-pbpY: This plasmid is used to construct an in-frame deletion of *pbpY* (*CC1875*), leaving intact the first 3 and the last 14 amino acid-encoding codons. The upstream (U) and downstream (D) regions of *pbpY* were PCR-amplified with EcoRI-1875 UF and 1875 DUR primers and 1875 UDF and SpeI-1875 DR primers, respectively. The resulting U and D PCR products were then combined by sewing PCR with EcoRI-1875 UF and SpeI-1875 DR primers. Finally, the sewing PCR product was ligated into pNPTS138 plasmid via EcoRI and SpeI sites.

pNPTS-pbpZ: This plasmid is used to construct an in-frame deletion of *pbpZ* (*CC3570*), leaving intact the first 22 and the last 8 codons of the coding sequence. The upstream (U) and downstream (D) regions of *pbpZ* were PCR-amplified with EcoRI-3570 UF and 3570 DUR primers and 3570 UDF and SpeI-3570 DR primers, respectively. The resulting U and D PCR products were then combined by sewing PCR with EcoRI-3570 UF and SpeI-3570 DR primers. Finally, the sewing PCR product was ligated into pNPTS138 plasmid via EcoRI and SpeI sites.

pRX-pbpX(E101Q E158Q): *pbpX(E101Q E158Q)* was PCR-amplified from ZG1051 genomic DNA with NdeI-0252 F and AgeI-0252 R primers and cloned into pRXMCS-5 via NdeI and AgeI sites.

pXyl-pbpX': The first 189 bp of *pbpX* coding sequence were amplified from CB15N genomic DNA, using NdeI-0252 F and NheI-0252 Rint primers. The reverse primer introduced a TAA stop codon after the 189-bp gene fragment. The PCR fragment was then cloned into pXMCS-5 via NdeI and NheI sites.

## References for Strains and Plasmids

1. Evinger, M., and Agabian, N. Envelope-associated nucleoid from *Caulobacter crescentus* stalked and swarmer cells. *J Bacteriol.* 132(1): 294-301. 1977.
2. Costa, T., Priyadarshini, R., and Jacobs-Wagner, C. Localization of PBP3 in *Caulobacter crescentus* is highly dynamic and largely relies on its functional transpeptidase domain. *Mol Microbiol.* 70(3): 634-51. 2008.
3. Thanbichler, M., Iniesta, A.A., and Shapiro, L. A comprehensive set of plasmids for vanillate- and xylose-inducible gene expression in *Caulobacter crescentus*. *Nucleic Acids Res.* 35(20): e137. 2007.

Figure S1

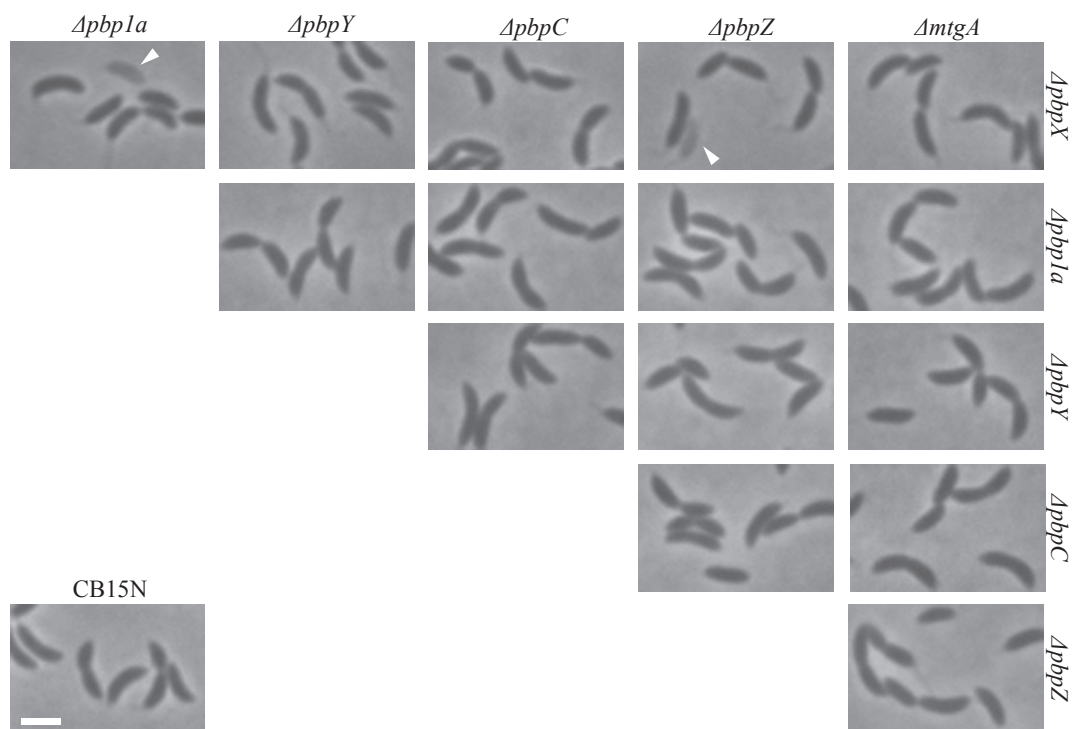

**Supplementary Figure 1. Double GTase deletions do not significantly affect cell shape**

Phase contrast images of the double deletion mutants arranged as a table. In all cases, arrowheads indicate lysed ghost cells. Wild-type CB15N is provided as a control. The scale bar is 2  $\mu$ m.

Figure S2

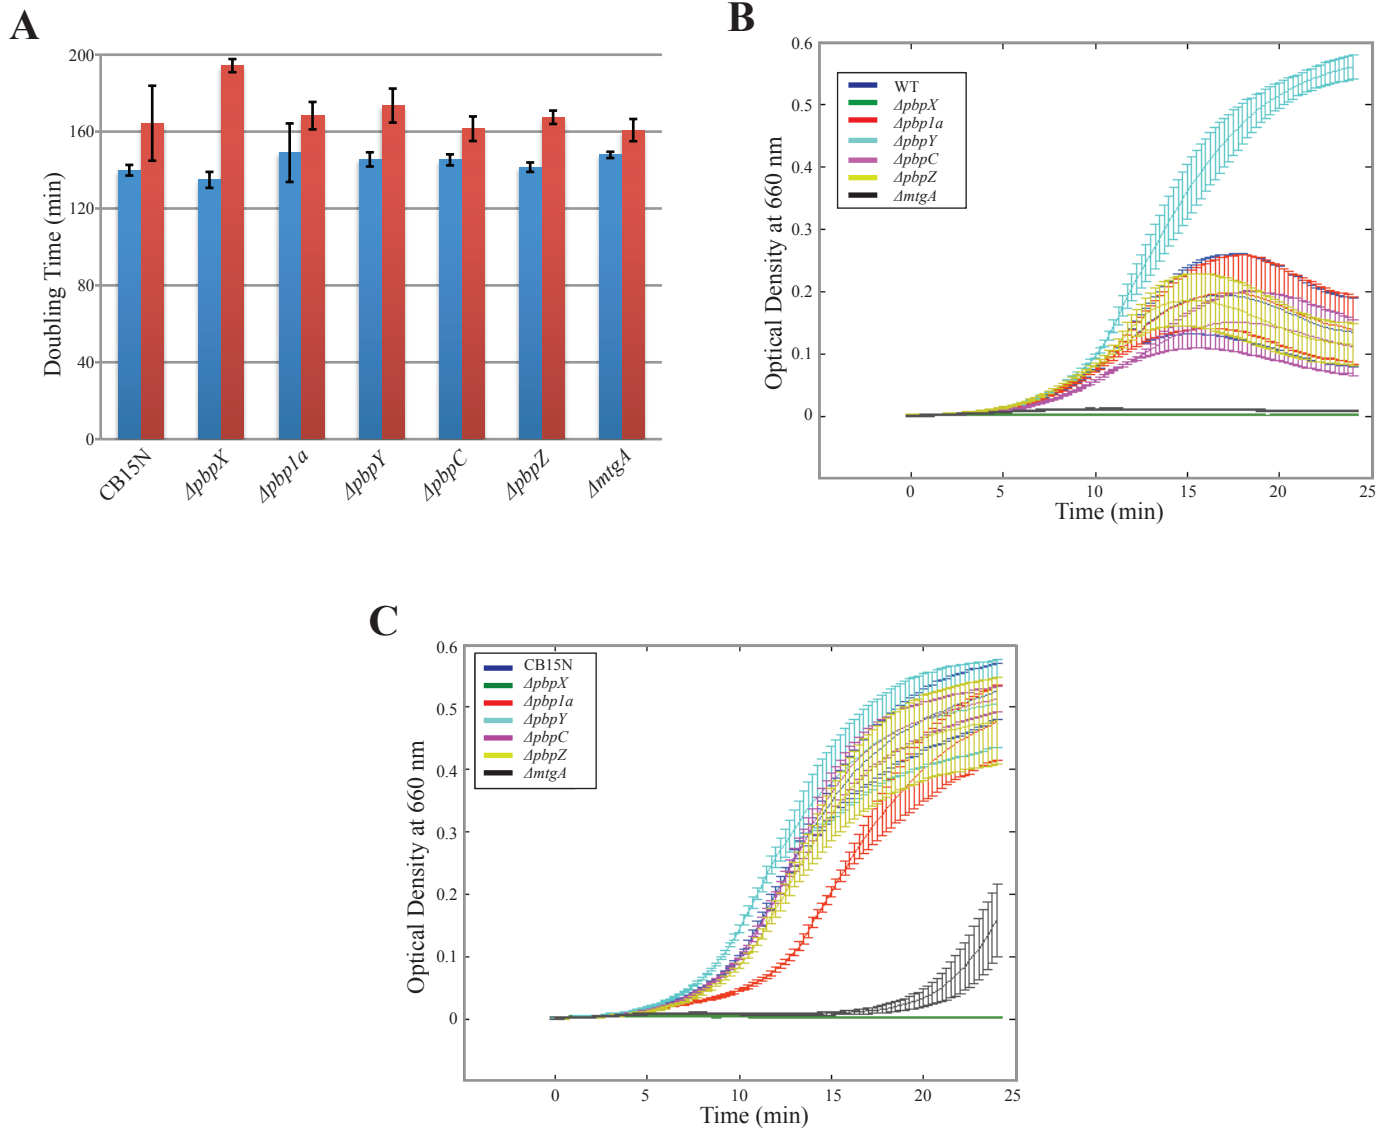

**Supplementary Figure 2. *pbpX* deletion sensitizes cells to osmotic shock, mecillinam, and cephalixin**

**A.** Doubling times (in minutes) of the single GTase deletion strains grown in M2G (blue) or M2G with 150 mM sucrose (red). Note that *ΔpbpX* grows at wild-type rate in regular minimal medium, likely due to slower growth lifting some of the strain from the PG remodeling machinery. **B.** Growth curves of wild-type and single TG deletion strains grown with 15 µg/ml mecillinam. To circumvent *Caulobacter*'s natural β-lactam resistance, TG deletions were introduced into *Δbla* genetic background for this experiment. **C.** Growth curves of wild-type (CB15N) and single TG deletion strains grown with 9 µg/ml cephalixin. All values represent the averages of 6 biological replicates.

Figure S3

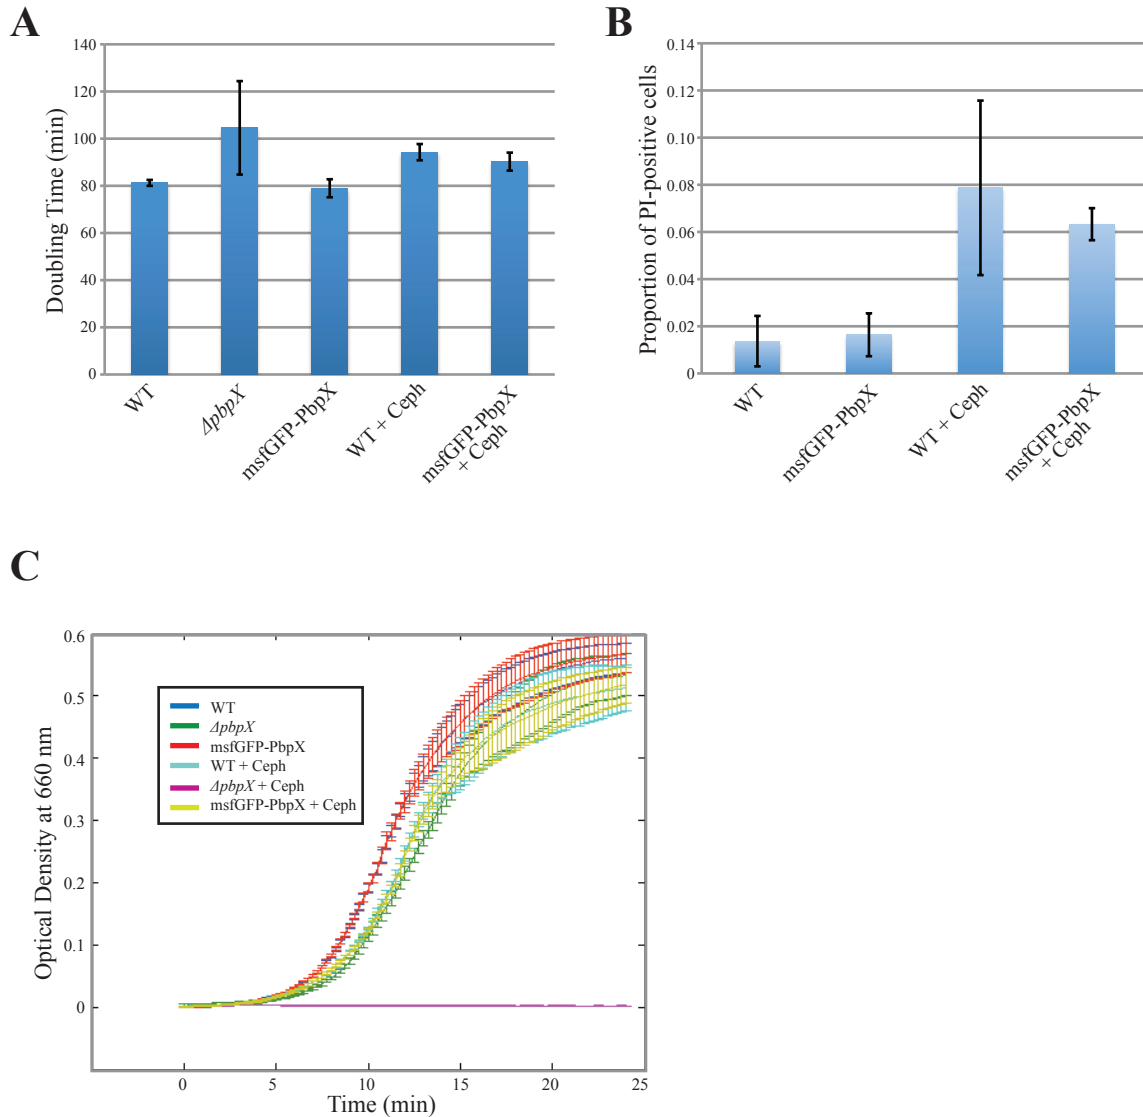

### Supplementary Figure 3. msfGFP-PbpX fusion is fully functional

**A.** Doubling time of msfGFP-PbpX strain with and without cephalaxin. CB15N and  $\Delta pbpX$  growth rates are provided for comparison, but  $\Delta pbpX$  with cephalaxin datum was omitted due to no growth. **B.** Proportion of PI-positive msfGFP-PbpX-encoding and wild-type cells with and without cephalaxin treatment. **C.** Growth curve of the strain encoding msfGFP-PbpX at the native locus,  $\Delta pbpX$ , and wild-type (CB15N) with and without cephalaxin, with each curve showing the average of 14 biological replicates. All error bars represent SD.

Figure S4

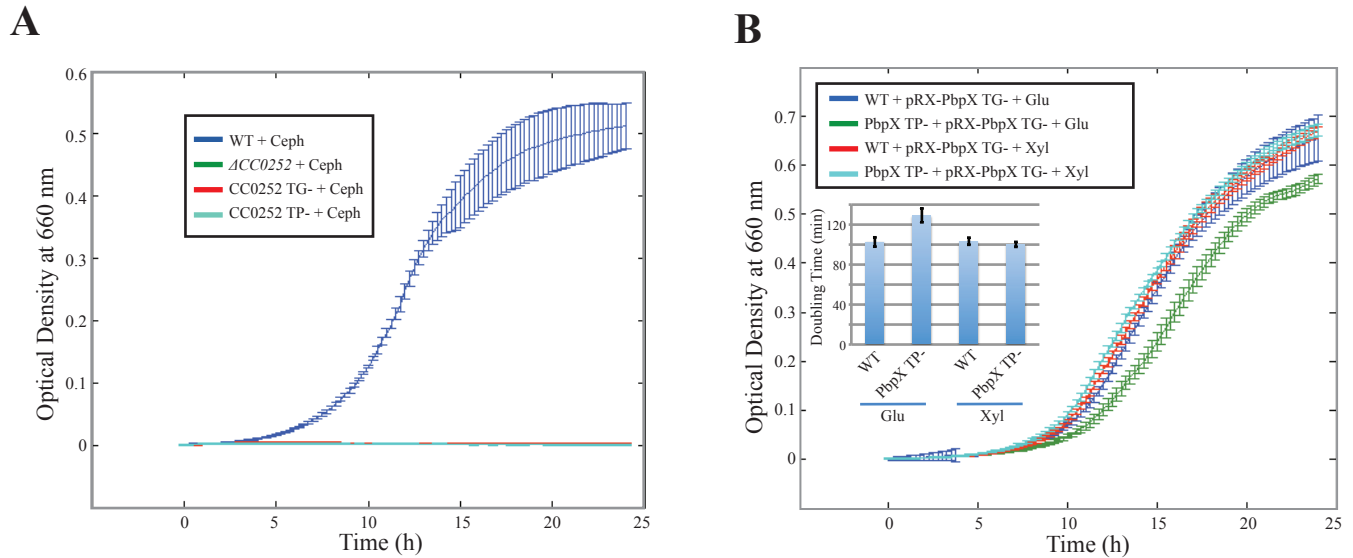

**Supplementary Figure 4. Transglycosylase and transpeptidase mutants of PbpX are both cephalixin-sensitive and complement each other**

**A.** Growth curve of the TG- and TP- PbpX mutants,  $\Delta$ *pbpX*, and wild-type (CB15N) grown with cephalixin. **B.** Growth curve of the WT and PbpX TP- strains carrying pRX-PbpX TG- plasmid and grown in the presence of either glucose (no induction) or xylose (induction). The inset shows the doubling times of both strains in both conditions. All error bars represent SD.
